# Supplementary material for: Associations Between Menopausal Hormone Therapy and Colorectal, Lung or Melanoma Cancer Recurrence and Mortality: A Systematic Reviews and Meta-Analysis
Source: Preprints.org preprint supplement (doi:10.20944/preprints202306.1560.v1), 2023-06-21
Supplement: Supplementary file 1 [file supplementary]

**Author´s conflict of interest**

Gabriel Fiol: MSD, Theramex, Procare Health Iberia

Iñaki Lete: Organon, Adamed España, Gedeon Ritcher

Laura Nieto: None declared

Ana Santaballa: None declared

María Jesús Plá: None declared

Laura Baquedano: Organon, Theramex

Joaquín Calaf: None declared

Pluvio Coronado: MSD, Shionogi, Adventia, Procare, Abex

Esther De la Viuda: Adamed, Bayer, Exeltis, Effik, Gedeon Ritcher, MSD, Organon, Procare Health Iberia, Sandoz, Shionogi, Teva, Theramex

Plácido Llaneza: None declared

Borja Otero: Exeltis Spain

Sonia Sánchez: Gynea-Kern, Shionogi, Theramex, Organon, Isdin, Lacer, Uriach, Dermolab

Isabel María Ramírez: Exeltis, MSD, Pfizer

Nicolás Mendoza: Astellas Pharma, Shionogi

**Author´s conflict of interest**

Gabriel Fiol: MSD, Theramex, Procare Health Iberia

Iñaki Lete: Organon, Adamed España, Gedeon Ritcher

Laura Nieto: None declared

Ana Santaballa: None declared

María Jesús Plá: None declared

Laura Baquedano: Organon, Theramex

Joaquín Calaf: None declared

Pluvio Coronado: MSD, Shionogi, Adventia, Procare, Abex

Esther De la Viuda: Adamed, Bayer, Exeltis, Effik, Gedeon Ritcher, MSD, Organon, Procare Health Iberia, Sandoz, Shionogi, Teva, Theramex

Plácido Llaneza: None declared

Borja Otero: Exeltis Spain

Sonia Sánchez: Gynea-Kern, Shionogi, Theramex, Organon, Isdin, Lacer, Uriach, Dermolab

Isabel María Ramírez: Exeltis, MSD, Pfizer

Nicolás Mendoza: Astellas Pharma, Shionogi
